# Supplementary material for: Radioactive Phosphorylation of Alcohols to Monitor Biocatalytic Diels-Alder Reactions
Source: PubMed Central journal article supplement (PMC3120863; doi:10.1371/journal.pone.0021391), 2011-06-22

**Dataset S1: Thin-layer plates from the reaction kinetics of dye-labeled Diels-Alderase ribozyme constructs, scanned for radioactivity (raw data)**

$U_6^{Cy3}-U_{30}^{Cy5}$

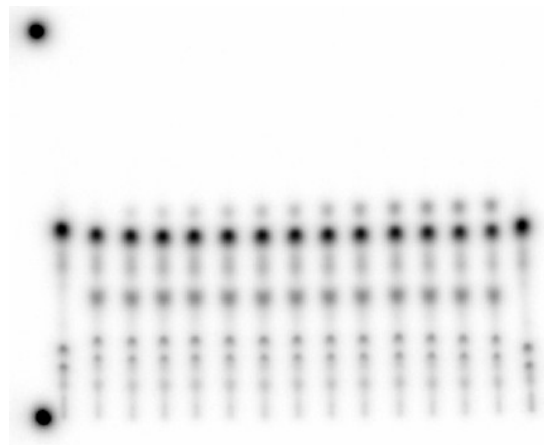

$U_6^{Cy3}-U_{33}^{Cy5}$

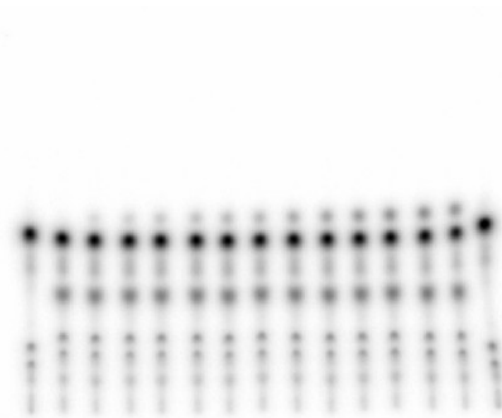

$U_6^{Cy3}-U_{42}^{Cy5}$

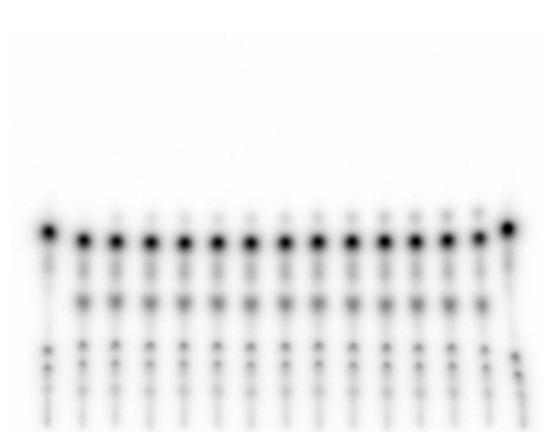

$U_{11}^{Cy3}-U_{30}^{Cy5}$

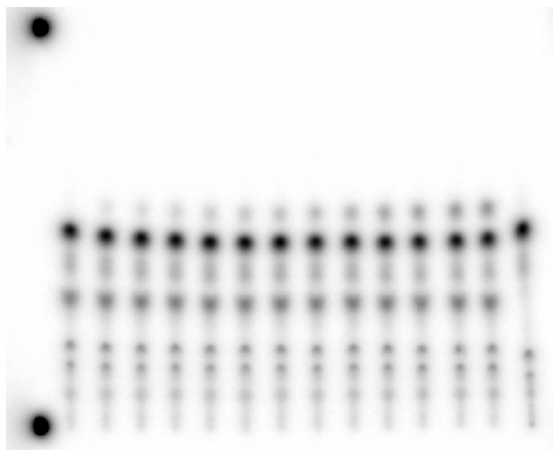

$U_{11}^{Cy3}-U_{42}^{Cy5}$

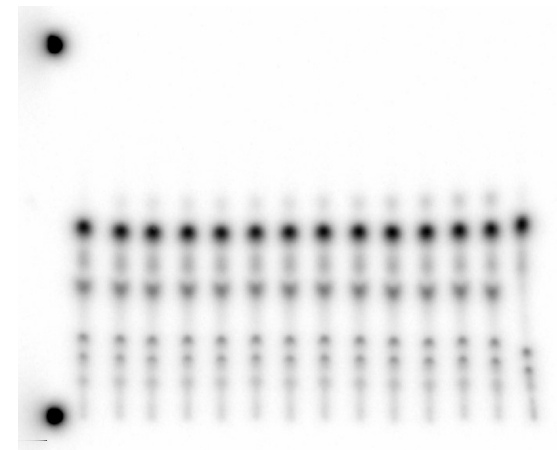

$5^{\text{Cy3}}\text{-U}_{33}\text{Cy5}$

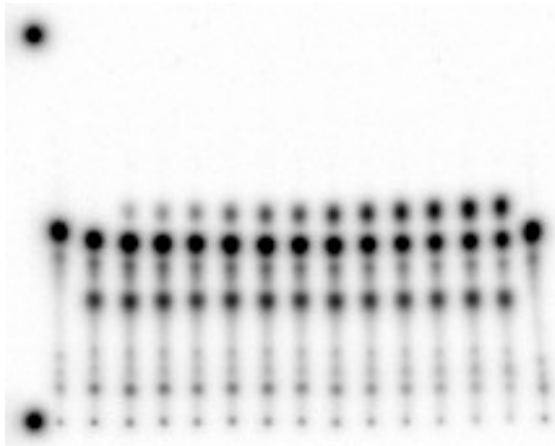

$5^{\text{Cy3}}\text{-U}_{50}\text{Cy5}$

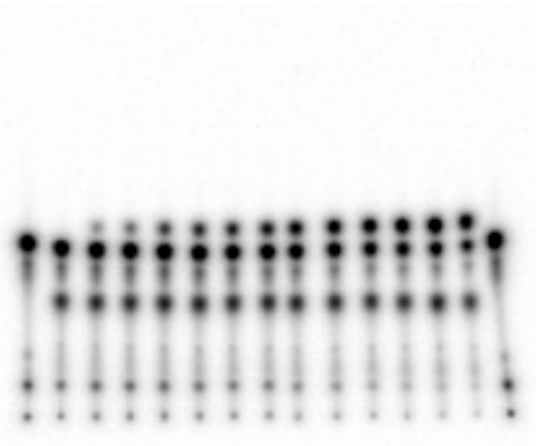

$U_6^{\text{Cy3}}\text{-A}_{41}\text{Cy5}$

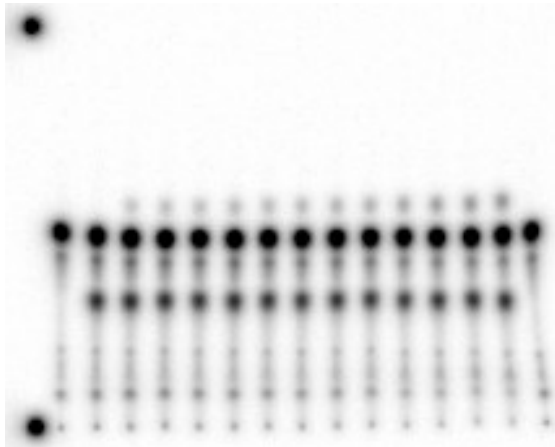

$U_6^{\text{Cy3}}\text{-U}_{50}\text{Cy5}$

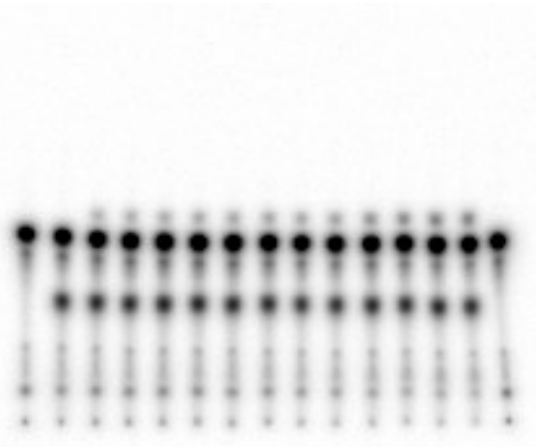

$U_{11}^{\text{Cy3}}\text{-U}_{50}\text{Cy5}$

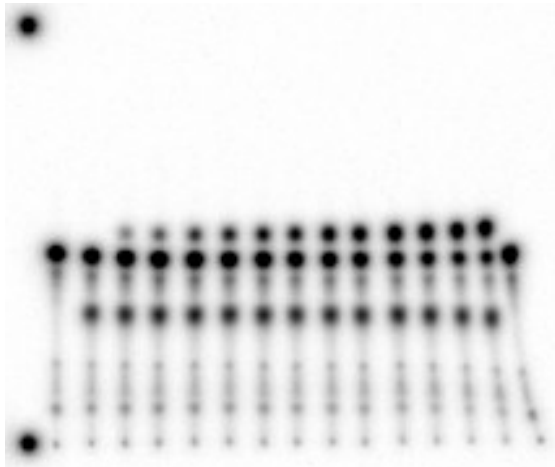

$U_{11}^{\text{Cy3}}\text{-U}_{33}\text{Cy5}$

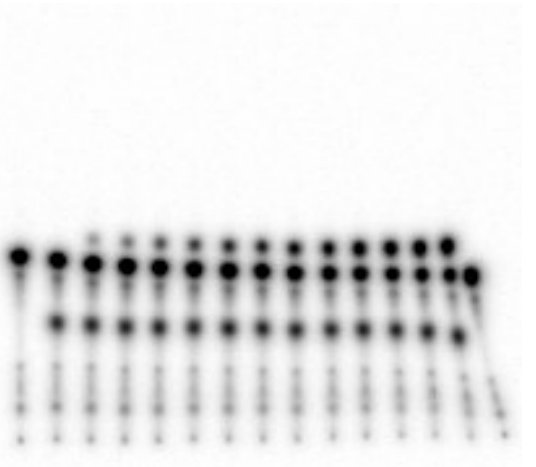

Supplement: pone.0021391.s002.pdf [file pone.0021391.s002.pdf]
