# Supplementary material for: Radioactive Phosphorylation of Alcohols to Monitor Biocatalytic Diels-Alder Reactions
Source: PubMed Central journal article supplement (PMC3120863; doi:10.1371/journal.pone.0021391), 2011-06-22

# Dataset S2: Mass spectrum of non-radioactive AHEG-<sup>31</sup>P

## Display Report

### Analysis Info

Analysis Name W:\HEIKOVAN\III-ANI-129\_B.d  
Method HR\_tune\_low\_neg\_180-1200.m  
Sample Name C27H35O10P = 550,1979 g/mol  
Comment

Acquisition Date 08.02.2011 08:01:53

Operator  
Instrument micrOTOF-Q II 10254

### Acquisition Parameter

|             |            |                       |           |                  |           |
|-------------|------------|-----------------------|-----------|------------------|-----------|
| Source Type | ESI        | Ion Polarity          | Negative  | Set Nebulizer    | 0.4 Bar   |
| Focus       | Not active | Set Capillary         | 2300 V    | Set Dry Heater   | 180 °C    |
| Scan Begin  | 50 m/z     | Set End Plate Offset  | -500 V    | Set Dry Gas      | 4.0 l/min |
| Scan End    | 1200 m/z   | Set Collision Cell RF | 250.0 Vpp | Set Divert Valve | Source    |

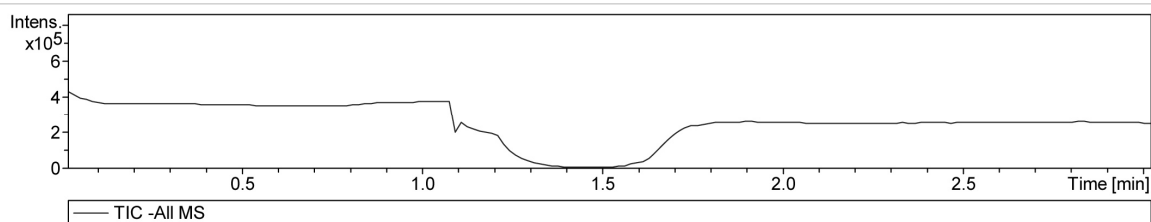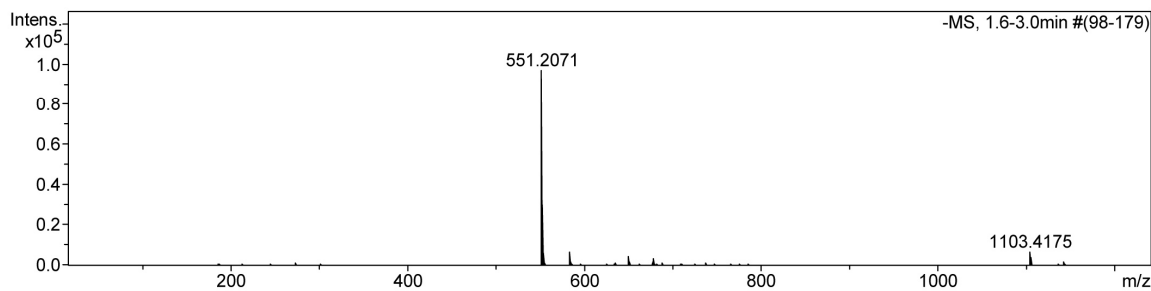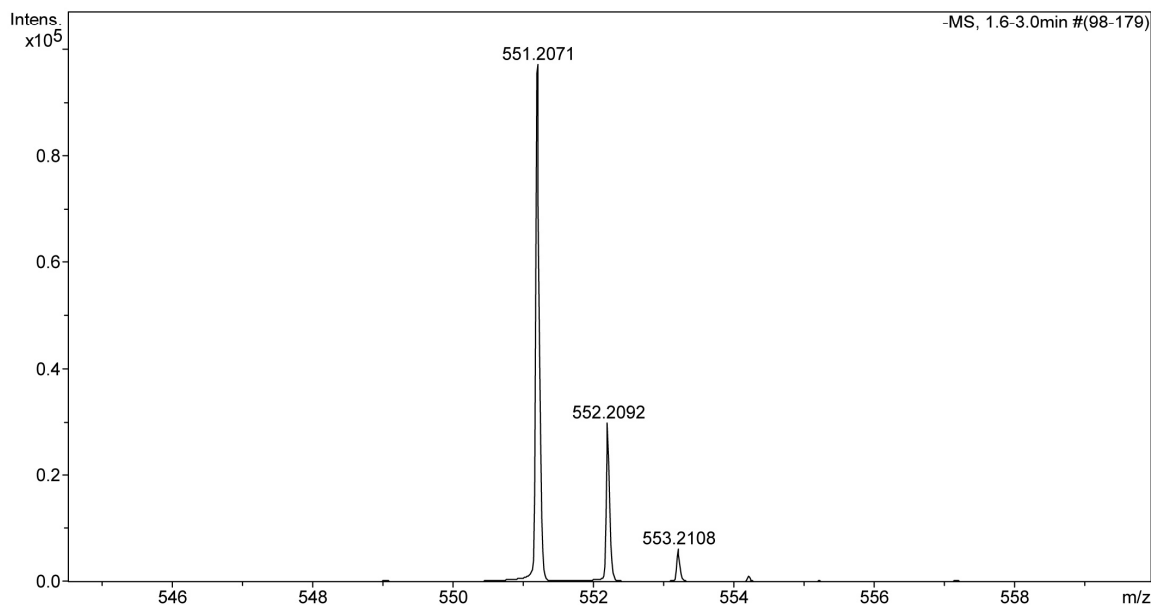

Supplement: pone.0021391.s003.pdf [file pone.0021391.s003.pdf]
